# Supplementary material for: Accuracy and quality of immunization data in Iran: findings from data quality self-assessment survey in 2017
Source: PubMed Central journal article supplement (PMC6560874; doi:10.1186/s12913-019-4188-9), 2019-06-11
Supplement: 12913_2019_4188_MOESM1_ESM.pdf [file 12913_2019_4188_MOESM1_ESM.pdf]

**Accuracy ratio of pentavalent 3 & MMR1 register in the community**

| Row | Register No. | Name of child | Date of birth |   |   | Date Pentavalent 3 vaccination (register) | Date MMR1 vaccination (register) | Card possession |    | Date Pentavalent 3 vaccination | Date MMR1 vaccination | Pentavalent 3 vaccination history |    | MMR1 vaccination history |    | Verified Pentavalent 3 |    | Verified MMR1 |    |
|-----|--------------|---------------|---------------|---|---|-------------------------------------------|----------------------------------|-----------------|----|--------------------------------|-----------------------|-----------------------------------|----|--------------------------|----|------------------------|----|---------------|----|
|     |              |               | D             | M | Y |                                           |                                  | Yes             | No |                                |                       | Yes                               | No | Yes                      | No | Yes                    | No | Yes           | No |
| 1   |              |               |               |   |   |                                           |                                  |                 |    |                                |                       |                                   |    |                          |    |                        |    |               |    |
| 2   |              |               |               |   |   |                                           |                                  |                 |    |                                |                       |                                   |    |                          |    |                        |    |               |    |
| 3   |              |               |               |   |   |                                           |                                  |                 |    |                                |                       |                                   |    |                          |    |                        |    |               |    |
| 4   |              |               |               |   |   |                                           |                                  |                 |    |                                |                       |                                   |    |                          |    |                        |    |               |    |
| 5   |              |               |               |   |   |                                           |                                  |                 |    |                                |                       |                                   |    |                          |    |                        |    |               |    |
| 6   |              |               |               |   |   |                                           |                                  |                 |    |                                |                       |                                   |    |                          |    |                        |    |               |    |
| 7   |              |               |               |   |   |                                           |                                  |                 |    |                                |                       |                                   |    |                          |    |                        |    |               |    |
| 8   |              |               |               |   |   |                                           |                                  |                 |    |                                |                       |                                   |    |                          |    |                        |    |               |    |
| 9   |              |               |               |   |   |                                           |                                  |                 |    |                                |                       |                                   |    |                          |    |                        |    |               |    |
| 10  |              |               |               |   |   |                                           |                                  |                 |    |                                |                       |                                   |    |                          |    |                        |    |               |    |
| 11  |              |               |               |   |   |                                           |                                  |                 |    |                                |                       |                                   |    |                          |    |                        |    |               |    |
| 12  |              |               |               |   |   |                                           |                                  |                 |    |                                |                       |                                   |    |                          |    |                        |    |               |    |
| 13  |              |               |               |   |   |                                           |                                  |                 |    |                                |                       |                                   |    |                          |    |                        |    |               |    |
| 14  |              |               |               |   |   |                                           |                                  |                 |    |                                |                       |                                   |    |                          |    |                        |    |               |    |
| 15  |              |               |               |   |   |                                           |                                  |                 |    |                                |                       |                                   |    |                          |    |                        |    |               |    |

Name of the interviewers \_\_\_\_\_ Team \_\_\_\_\_ Date of interview \_\_\_\_\_
