# Supplementary material for: Accuracy and quality of immunization data in Iran: findings from data quality self-assessment survey in 2017
Source: PubMed Central journal article supplement (PMC6560874; doi:10.1186/s12913-019-4188-9), 2019-06-11
Supplement: 12913_2019_4188_MOESM2_ESM.pdf [file 12913_2019_4188_MOESM2_ESM.pdf]

### Accuracy ratio of pentvalent 3 and MMR1 vaccines

| Year | Month    | Pentvalent 3 |          | MMR1      |          |
|------|----------|--------------|----------|-----------|----------|
|      |          | Recounted    | Reported | Recounted | Reported |
| 2015 | January  |              |          |           |          |
|      | February |              |          |           |          |
|      | March    |              |          |           |          |
| 2016 | April    |              |          |           |          |
|      | May      |              |          |           |          |
|      | June     |              |          |           |          |
| Sum  |          |              |          |           |          |
