# Supplementary material for: Accuracy and quality of immunization data in Iran: findings from data quality self-assessment survey in 2017
Source: PubMed Central journal article supplement (PMC6560874; doi:10.1186/s12913-019-4188-9), 2019-06-11
Supplement: 12913_2019_4188_MOESM3_ESM.pdf [file 12913_2019_4188_MOESM3_ESM.pdf]

## Standard questions to assess the quality of the monitoring system

### B. Health units' level

| Question                        | This question should be designed to find out:                                                                                            | Weight (from 1 to 3)                                                                                                                                                                              |  |
|---------------------------------|------------------------------------------------------------------------------------------------------------------------------------------|---------------------------------------------------------------------------------------------------------------------------------------------------------------------------------------------------|--|
| <b>Recording component (HU)</b> |                                                                                                                                          |                                                                                                                                                                                                   |  |
| 1                               | Are there tally sheets for infant vaccinations on the desk (or easily available) and do they have entries for the last immunization day? | The main concern is evidence of use of availability (official form) and tally sheet.                                                                                                              |  |
| 2                               | Are registers used for recording individual information about child immunizations?                                                       | Each HU should have a book or register where each immunization history can be registered and traced back.                                                                                         |  |
| 3                               | Can a child's vaccination history be easily and rapidly retrieved in the registers?                                                      | A new dose should not be entered as a complete new entry but entered in the location where previous doses have been entered. Score 0 if the register is used as a new entry for any immunization. |  |
| 4                               | Are registers (or pre-printed forms) used for recording individual information about women's TT immunizations?                           | There may be registers or health cards if cards kept in HU.                                                                                                                                       |  |
| 5                               | Observe at least five vaccinations:<br><br>Were all vaccinations well registered on the child health card/tally sheet/register?          |                                                                                                                                                                                                   |  |
| 6                               | Are individual immunization records used, updated and given to the child's caretaker at the time of the immunization visit?              | Blank cards should be available in the HU. Immunization cards are often integrated in "Road to Health" or other health cards.                                                                     |  |
| 7                               | Are vaccine receipts recorded in a vaccine ledger?                                                                                       | Check against available stock (count doses in the refrigerator).                                                                                                                                  |  |
| 8                               | Ask the child's caretaker: Do you know the expected date of receiving vaccine?                                                           | Find out whether the expected dates are known.                                                                                                                                                    |  |
| 9                               | Is the ledger up to date for all vaccines and/or a selected vaccine?                                                                     | Up to date = all receipts and issues recorded immediately.<br><br>Check against stock (in therefrigerator). Compare the date of last entry and the date of the last immunization session.         |  |
| 10                              | Is the receipt of a selected vaccine in the ledger complete for the entire year?                                                         |                                                                                                                                                                                                   |  |
| 11                              | Is there a log (vaccine ledger/stock card) for receipt/issuing of syringes supplied (AD/non-AD reconstitution syringes)?                 | Can perform a stock check.                                                                                                                                                                        |  |
| 12                              | Does the HU record vaccine batch-number and expiry date?                                                                                 |                                                                                                                                                                                                   |  |
| 13                              | Are all individual recording forms available for the entire previous year?                                                               | Individual recording form = tally sheet or register.                                                                                                                                              |  |

|                                               |                                                                                                                                                 |                                                                                                                                                                                                                        |  |
|-----------------------------------------------|-------------------------------------------------------------------------------------------------------------------------------------------------|------------------------------------------------------------------------------------------------------------------------------------------------------------------------------------------------------------------------|--|
| 14                                            | Did every person doing the child immunization card exercise get a perfect score for: DTP1<br>DTP3<br>measles?                                   | Need to define how the scoring will be if a perfect score is not obtained.                                                                                                                                             |  |
| 15                                            | Is the cold chain temperature monitoring chart completed daily?                                                                                 | Check the chart and compare the latest reported temperature with the actual temperature in the refrigerator.                                                                                                           |  |
| <b>Reporting component (HU)</b>               |                                                                                                                                                 |                                                                                                                                                                                                                        |  |
| 16                                            | Have all reports for the previous year been signed by the officer-in-charge or officer authorized to submit the HU report?                      | Score for example:<br>If >50% reports are signed score "Yes".<br>If <100% discuss with the HU why some have not been signed.                                                                                           |  |
| 17                                            | Does each report from the previous year have at least one date stamped or written on it by the HU – either as "signed date" or "compiled date"? | If >50% reports are signed score "Yes".<br>If <100% discuss with the HU why some have no data stamped or written in. This can be answered at district level.                                                           |  |
| 18                                            | Are the HU reports correctly filled in?                                                                                                         | Select a number of fields to be checked in all HU reports and check whether these have been filled in correctly.                                                                                                       |  |
| 19                                            | Are health staff aware of standard operating procedures and the necessary forms to complete if there is a report of a severe AEFI?              | Ask health staff what is supposed to be done if a child becomes severely ill or dies after a vaccination. Ask to see any forms that are to be used.                                                                    |  |
| 20                                            | Are the HU reports completely filled in?                                                                                                        | Select a number of fields to be checked in all HU reports from the previous year and check whether these have been filled in.                                                                                          |  |
| <b>Archiving component (HU)</b>               |                                                                                                                                                 |                                                                                                                                                                                                                        |  |
| 21                                            | Can copies of all previous reports from this HU be found in the HU?                                                                             | For current and previous year.                                                                                                                                                                                         |  |
| 22                                            | Is there one location where the previous immunization reports and recording forms are stored?                                                   |                                                                                                                                                                                                                        |  |
| 23                                            | Are the reports of the HU organized in a file by date?                                                                                          | The main concern is that the reports are easily retrievable.                                                                                                                                                           |  |
| 24                                            | Are HU reports available for the entire year?                                                                                                   |                                                                                                                                                                                                                        |  |
| 25                                            | Are the child registers available for all periods of the previous year?                                                                         |                                                                                                                                                                                                                        |  |
| 26                                            | Can all tally sheets covering the previous year be found?                                                                                       |                                                                                                                                                                                                                        |  |
| 27                                            | Are registers for TT vaccinations to pregnant women available for the entire previous year?                                                     |                                                                                                                                                                                                                        |  |
| 28                                            | Is the latest feedback on data from district easily available?                                                                                  |                                                                                                                                                                                                                        |  |
| <b>Demographic information component (HU)</b> |                                                                                                                                                 |                                                                                                                                                                                                                        |  |
| 29                                            | Does the HU have data on the number of infants born in its catchment area?                                                                      | The number of births should be different from the previous year. Discuss if there is a difference with the denominator available at more central level. Discuss ways to collect denominator information from community |  |

|                                                         |                                                                                                                                                          |                                                                                                                                                                                                                                     |  |
|---------------------------------------------------------|----------------------------------------------------------------------------------------------------------------------------------------------------------|-------------------------------------------------------------------------------------------------------------------------------------------------------------------------------------------------------------------------------------|--|
|                                                         |                                                                                                                                                          | (e.g. birth register), data from national immunization days (NIDs), or other sources. Discuss if the target was set up by the district or HU level.                                                                                 |  |
| 30                                                      | Does the HU have a target set on the number of children that should be vaccinated during the calendar year?                                              | Discuss how realistic the value is.                                                                                                                                                                                                 |  |
| 31                                                      | Does the HU have a system that allows the collection of information on new births in the community?                                                      | This may include community health workers, traditional birth attendants, outreach clinics, etc. A system means (a) organized way to collect the information in every village/community and (b) a written track available at the HU. |  |
| 32                                                      | Does the HU have a target by type of strategy (fixed/outreach/mobile) with a map showing the catchment area by strategy including the outreach villages? |                                                                                                                                                                                                                                     |  |
| <b>Core outputs/analysis (HU)</b>                       |                                                                                                                                                          |                                                                                                                                                                                                                                     |  |
| 33                                                      | Does the HU have a (target) number of children that it strives to vaccinate during a calendar year or a reporting period?                                |                                                                                                                                                                                                                                     |  |
| 34                                                      | Is there a mechanism in place to track defaulters?                                                                                                       | Can be an appropriate use of a correctly filled register, tickler file, etc. When was the last time a child was followed up?                                                                                                        |  |
| 35                                                      | Does the HU have achievements split by type of strategy – fixed/outreach/mobile?                                                                         | It is important is to know the proportion of numbers actually reached by each strategy.                                                                                                                                             |  |
| 36                                                      | Does the HU have an up-to-date chart or table (preferably on display) showing the number of vaccinations by report period for the current year?          | Monitoring coverage chart – must be UP TO DATE.                                                                                                                                                                                     |  |
| 37                                                      | Is there a monthly chart/graph of VPD cases (broken down by VPD)?                                                                                        | How do these data correspond to coverage data (i.e. more cases in areas with poor coverage). When was the last VPD outbreak? Was it investigated? Why did it occur?                                                                 |  |
| 38                                                      | Does the HU monitor drop-out rate?                                                                                                                       | Preferably on display with the same monitoring chart as the coverage one, but score 1 if the health worker can tell you the drop-out rate for his HU. Discuss the importance and reasons for drop-outs.                             |  |
| 39                                                      | Does the HU monitor vaccine wastage?                                                                                                                     | Discuss the reasons for wastage and any ways it might be reduced. Discuss whether the health worker knows how much the vaccine wastage is and how it can be calculated.                                                             |  |
| <b>Evidence of using data for action component (HU)</b> |                                                                                                                                                          |                                                                                                                                                                                                                                     |  |
| 40                                                      | Is there a mechanism in place to track defaulters or vaccine doses that are due?                                                                         | Check how the HU can know when a child should return for a vaccine dose (e.g. DTP,                                                                                                                                                  |  |

|    |                                                                                                           |                                                                                                                                                                             |  |
|----|-----------------------------------------------------------------------------------------------------------|-----------------------------------------------------------------------------------------------------------------------------------------------------------------------------|--|
|    |                                                                                                           | Hib, HepB, polio, measles or yellow fever vaccine dose).                                                                                                                    |  |
| 41 | Is there a map showing the catchment area, including the outreach villages?                               | This ideally shows strategy type.                                                                                                                                           |  |
| 42 | Are areas of low access identified and is there evidence of actions taken to deal with this?              | If there is low access (evidenced by low BCG or DTP1 coverage), how does it relate to the effectiveness of the three strategies (fixed site, outreach and/or mobile teams). |  |
| 43 | Have reasons for any high drop-out been identified; are there plans/actions to deal with this?            | Are there any managerial practices that can be changed?                                                                                                                     |  |
| 44 | Have actions been taken on the last feedback from the district?                                           |                                                                                                                                                                             |  |
| 45 | Is there interaction with the community regarding immunization? Ask for information on “what” and “when”? | Are health staff actively involved in any community committees or meetings on health, investigations of outbreaks or any rumours of AEFIs, etc?                             |  |
