# Supplementary material for: Accuracy and quality of immunization data in Iran: findings from data quality self-assessment survey in 2017
Source: BMC Health Serv Res. 2019 Jun 11;19:371. doi: 10.1186/s12913-019-4188-9 (PMC6560874; doi:10.1186/s12913-019-4188-9)
Supplement: Supplementary file 5 — Timeliness and completeness of Pentavalent 3 and MMR1vaccines reporting (PDF 12 kb) [file 12913_2019_4188_MOESM5_ESM.pdf]

Timeliness and completeness of Pentavalent 3 and MMR1 vaccines reporting

| Year | Month    | MMR1       |     |              |     | Pentavalent 3 |     |              |     |
|------|----------|------------|-----|--------------|-----|---------------|-----|--------------|-----|
|      |          | Timeliness |     | Completeness |     | Timeliness    |     | Completeness |     |
|      |          | No         | Yes | No           | Yes | No            | Yes | No           | Yes |
| 2015 | January  |            |     |              |     |               |     |              |     |
|      | February |            |     |              |     |               |     |              |     |
|      | March    |            |     |              |     |               |     |              |     |
| 2016 | April    |            |     |              |     |               |     |              |     |
|      | May      |            |     |              |     |               |     |              |     |
|      | June     |            |     |              |     |               |     |              |     |
| Sum  |          |            |     |              |     |               |     |              |     |
